# Supplementary material
Source: PubMed Central journal article supplement (PMC1858635)
Supplement: NIHMS14405-supplement-Supplementary.pdf [file NIHMS14405-supplement-Supplementary.pdf]

## Supplementary Material

### Computing low-cost rearrangements

For each new occurrence of an architecture, we use simple search or dynamic programming to identify rearrangement solutions with lowest cost. There is a separate procedure for each rearrangement class, as described below. The cost function is the total number of fusion and fission operations. In this section, we consider each architecture to be a sequence or ordered list of domains.

**Fusion:** Identify parent architectures that are subsequences of the new architecture. Use dynamic programming to select arrangements of parent architectures and new domains, when needed, which can be concatenated into the new architecture using the smallest number of fusion operations. The cost of a solution is equal to the number of sources used minus one.

**Fission:** Identify parent architectures that are super-sequences of the new architecture. The cost of a solution is one if the new architecture includes an endpoint of the parent architecture. Otherwise, cost is two. Choose the parent architectures with lowest cost.

**Insertion:** Search for one parent architecture and either a second parent architecture or a new domain, as required by the presence of new domains in the new architecture, such that the second can be inserted into the first. All such pairs are possible solutions with cost three.

**Deletion:** As in the Fission case, identify parent architectures that are super-sequences of the new architectures. In this case, the pairwise order of domains in the parent architecture should be the same as in the new architecture, but domains are not required to be consecutive in the parent architecture. Use dynamic programming to identify domains that can be removed from the parent architecture with minimum cost to produce the new architecture.

**Other:** This is the most general case, in which any rearrangement of parent architectures and new domains can be computed. First, we identify all parent architectures that share any domain with the new architecture. Then, we use dynamic programming as in the Fusion case to determine arrangements of domains that can be concatenated to form the new architecture, including all necessary fusion and fission operations into total cost. This procedure differs from Fusion in that for each domain, there may be a cost for splicing the domains from parent architectures. In theory, every domain in the new architecture can be taken from any parent architecture that contains the domain, yielding an exponentially growing number of solutions. To limit the number of solutions, after identifying lowest-cost solutions, we retain those with the smallest number of sources.

## Alternative parsimony models

To probe the robustness of our results against changes in the parsimony rule for assigning architectures to internal tree nodes, we compare our MP setting with Dollo parsimony, which is a commonly assumed model, and two variations of MP. In the first variation which we call MP-2child, a parent node with at least two children labeled present for an algorithm will automatically be labeled present, otherwise defaults to standard MP. This variation addresses our concern that MP, typically envisioned with a binary or near-binary tree, is not the ideal rule to assign nodes with higher degree. In the second variation, which we call MP- $X$  where  $X$  has a numeric value, we modify the first pass of the internal node assignment algorithm as follows:

- If architecture is present in more than  $\max\{X\%, 50\%\}$  of labeled children  $\rightarrow$  label parent *present*.
- If architecture is present in less than  $\min\{X\%, 50\%\}$  of labeled children  $\rightarrow$  label parent *absent*.
- If architecture is present in between  $X\%$  and  $50\%$  of labeled children  $\rightarrow$  label parent *unknown*.

Standard maximum parsimony is equivalent to the case where  $X=50$ . Decreasing  $X$  makes it possible to identify an architecture as present in a parent node as present when fewer children contain that architecture. Increasing  $X$  has the opposite effect, making the rule for propagation of architectures up the tree more strict. Using a range of values rather than exact values circumvents automatic propagation of absent/present status. To illustrate this problem, if we were to use the rule that assigns architecture  $A$  to a node if more than 49% of children have architecture  $A$  present, starting with a leaf node containing  $A$ , every ancestor with only two children will be assigned  $A$ . This clearly violates the intent of MP to minimize tree cost while making reasonable assignments. We consider values of  $X$  between 25 and 75 that correspond to specific combinations at child nodes, e.g.  $X=33$  refers to the case with 1 child labeled present and 2 children labeled absent.

The immediate result of modifying the parsimony scheme is new assignments of architectures to nodes.

Figure 1 provides a snapshot of the changes induced by various parsimony rules through the number of architectures assigned to selected nodes. Dollo parsimony is expected to yield the greatest changes because its underlying premise is differs from that of MP—it assigns each architecture to be gained at the Last Common Ancestor of all organisms containing that architecture without considering the tree cost, i.e. the number of gains and losses. Dollo parsimony yields five times as many architectures at the root node as MP and multiple times as many architectures at the Archaea, Bacteria, and Eukaryotes nodes. Nearly all architectures are assigned to internal nodes. These confirm that Dollo parsimony tends to label architectures as being more ancient than MP indicates.

The indirect consequence of new architecture assignments at nodes is changes in the solutions we compute for each architecture. While new architectures will appear at different nodes, our main conclusions regarding the distribution of rearrangements over our defined cases does not change over any parsimony method (Figure 2). Even Dollo parsimony produces fairly small changes in the number of architectures at each rearrangement case.

Variants of MP show little difference in node assignment or distribution of rearrangement cases. The one exception is MP-25 and MP-35 assigning more architectures to the root. This outcome is due to these methods allowing an architecture to be assigned to the root if it is present

in only one of Archaea, Bacteria, and Eukaryotes, which in fact is not ideal and suggests that MP-X with X closer to 50 is preferable.

**Figure 1: Number of architectures present in each node or group of nodes. To simplify our analysis, we reduce the TOL into Cellular Organisms (root), Archaea, Bacteria, Eukaryotes, all other interior nodes (interim nodes).**

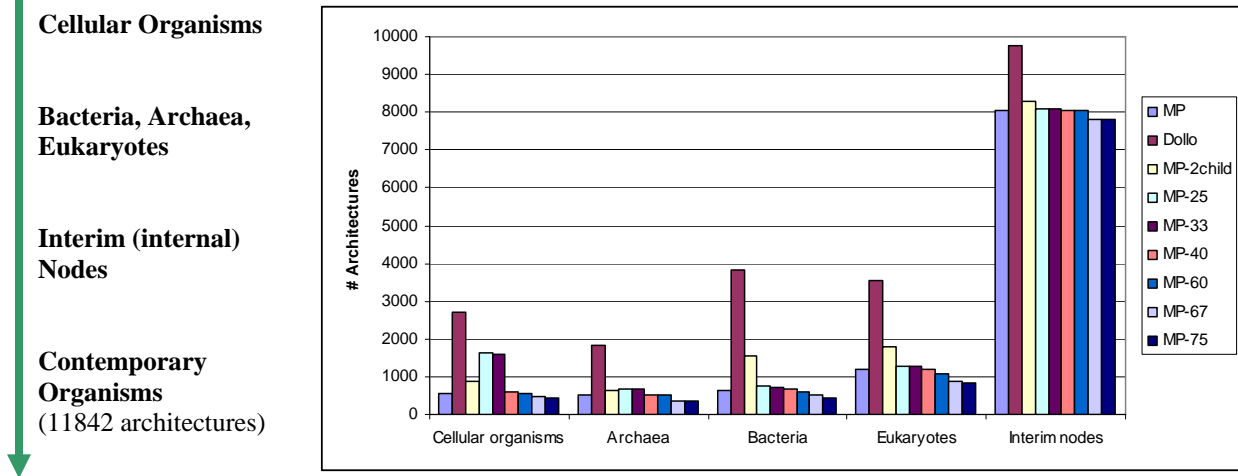

**Figure 2: Number of architectures whose most common solution is of each case, with multiple cases among most common solutions counted among the ties. Each line illustrates the values for one rearrangement case.**

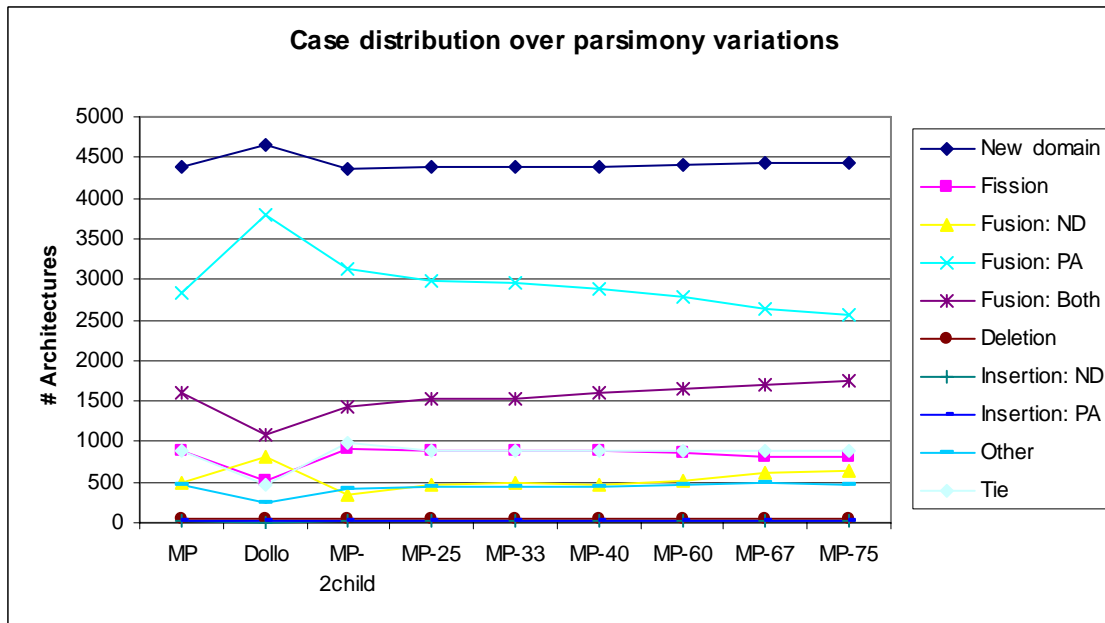

Supplementary Table 1: Table of species

|                                                   |                                                                |
|---------------------------------------------------|----------------------------------------------------------------|
| Anopheles gambiae                                 | Helicobacter hepaticus ATCC 51449                              |
| Arabidopsis thaliana                              | Idiomarina loihiensis L2TR                                     |
| Caenorhabditis elegans                            | Lactobacillus plantarum WCFS1                                  |
| Drosophila melanogaster                           | Lactococcus lactis subsp. lactis II1403                        |
| Encephalitozoon cuniculi                          | Legionella pneumophila subsp. pneumophila str. Philadelphia 1  |
| Saccharomyces cerevisiae                          | Leifsonia xyli subsp. xyli str. CTCB07                         |
| Plasmodium falciparum                             | Leptospira interrogans serovar Copenhageni str. Fiocruz L1-130 |
| Schizosaccharomyces pombe                         | Listeria monocytogenes str. 4b F2365                           |
| Homo sapiens                                      | Mannheimia succiniciproducens MBEL55E                          |
| Mus musculus                                      | Mesoplasma florum L1                                           |
| Rattus norvegicus                                 | Mesorhizobium loti MAFF303099                                  |
| Danio rerio                                       | Methanocaldococcus jannaschii DSM 2661                         |
| Oryza sativa                                      | Methanococcus maripaludis S2                                   |
| Filobasidiella neoformans                         | Methanopyrus kandleri AV19                                     |
| Entamoeba histolytica                             | Methanosarcina acetivorans C2A                                 |
| Eremothecium gossypii                             | Methanothermobacter thermautotrophicus str. Delta H            |
| Kluyveromyces lactis                              | Methylococcus capsulatus str. Bath                             |
| Leishmania major                                  | Mycobacterium avium subsp. paratuberculosis K-10               |
| Trypanosoma cruzi                                 | Mycoplasma penetrans HF-2                                      |
| Yarrowia lipolytica                               | Nanoarchaeum equitans Kin4-M                                   |
| Plasmodium berghei                                | Natronomonas pharaonis DSM 2160                                |
| Plasmodium chabaudi                               | Neisseria meningitidis Z2491                                   |
| Trypanosoma brucei                                | Nitrobacter winogradskyi Nb-255                                |
| Caenorhabditis briggsae                           | Nitrosococcus oceani ATCC 19707                                |
| Bos taurus                                        | Nitrosomonas europaea ATCC 19718                               |
| Canis familiaris                                  | Nocardia farcinica IFM 10152                                   |
| Dictyostelium discoideum                          | Nostoc sp. PCC 7120                                            |
| Apis mellifera                                    | Oceanobacillus iheyensis HTE831                                |
| Strongylocentrotus purpuratus                     | Onion yellows phytoplasma OY-M                                 |
| Gallus gallus                                     | Parachlamydia sp. UWE25                                        |
| Xenopus laevis                                    | Pasteurella multocida subsp. multocida str. Pm70               |
| Acinetobacter sp. ADP1                            | Pelobacter carbinolicus DSM 2380                               |
| Aeropyrum pernix K1                               | Photobacterium profundum SS9                                   |
| Agrobacterium tumefaciens str. C58                | Photorhabdus luminescens subsp. laumondii TTO1                 |
| Anabaena variabilis ATCC 29413                    | Picrophilus torridus DSM 9790                                  |
| Anaplasma marginale str. St. Maries               | Porphyromonas gingivalis W83                                   |
| Aquifex aeolicus VF5                              | Prochlorococcus marinus str. MIT 9313                          |
| Archaeoglobus fulgidus DSM 4304                   | Propionibacterium acnes KPA171202                              |
| Azoarcus sp. EbN1                                 | Pseudoalteromonas haloplanktis TAC125                          |
| Bacillus cereus ATCC 14579                        | Pseudomonas fluorescens Pf-5                                   |
| Bacteroides fragilis NCTC 9343                    | Psychrobacter arcticus 273-4                                   |
| Bartonella henselae str. Houston-1                | Pyrobaculum aerophilum str. IM2                                |
| Bdellovibrio bacteriovorus HD100                  | Pyrococcus furiosus DSM 3638                                   |
| Bifidobacterium longum NCC2705                    | Ralstonia eutropha JMP134                                      |
| Bordetella bronchiseptica RB50                    | Rhodobacter sphaeroides 2.4.1                                  |
| Borrelia garinii PBI                              | Rhodopirellula baltica SH 1                                    |
| Bradyrhizobium japonicum USDA 110                 | Rhodopseudomonas palustris CGA009                              |
| Brucella suis 1330                                | Rickettsia felis URRWXCal2                                     |
| Buchnera aphidicola str. APS (Acyrtosiphon pisum) |                                                                |

|                                                                                                                                                                                                                                                                                                                                                                                                                                                                                                                                                                                                                                                                                                                                                                                                                                                                                                                                                                                                                                                                                                                                                                                                                                                                                                                                                                                                                                                                                                     |                                                                                                                                                                                                                                                                                                                                                                                                                                                                                                                                                                                                                                                                                                                                                                                                                                                                                                                                                                                                                                                                                                                                                                                                                                                                                                                                                                                                                                                                                                                             |
|-----------------------------------------------------------------------------------------------------------------------------------------------------------------------------------------------------------------------------------------------------------------------------------------------------------------------------------------------------------------------------------------------------------------------------------------------------------------------------------------------------------------------------------------------------------------------------------------------------------------------------------------------------------------------------------------------------------------------------------------------------------------------------------------------------------------------------------------------------------------------------------------------------------------------------------------------------------------------------------------------------------------------------------------------------------------------------------------------------------------------------------------------------------------------------------------------------------------------------------------------------------------------------------------------------------------------------------------------------------------------------------------------------------------------------------------------------------------------------------------------------|-----------------------------------------------------------------------------------------------------------------------------------------------------------------------------------------------------------------------------------------------------------------------------------------------------------------------------------------------------------------------------------------------------------------------------------------------------------------------------------------------------------------------------------------------------------------------------------------------------------------------------------------------------------------------------------------------------------------------------------------------------------------------------------------------------------------------------------------------------------------------------------------------------------------------------------------------------------------------------------------------------------------------------------------------------------------------------------------------------------------------------------------------------------------------------------------------------------------------------------------------------------------------------------------------------------------------------------------------------------------------------------------------------------------------------------------------------------------------------------------------------------------------------|
| <p> <i>Burkholderia</i> sp. 383<br/> <i>Campylobacter jejuni</i> RM1221<br/> <i>Candidatus Pelagibacter ubique</i> HTCC1062<br/> <i>Carboxydotherrnus hydrogenoformans</i> Z-2901<br/> <i>Caulobacter crescentus</i> CB15<br/> <i>Chlamydia trachomatis</i> D/UW-3/CX<br/> <i>Chlamydophila pneumoniae</i> TW-183<br/> <i>Chlorobium tepidum</i> TLS<br/> <i>Chromobacterium violaceum</i> ATCC 12472<br/> <i>Clostridium acetobutylicum</i> ATCC 824<br/> <i>Colwellia psychrerythraea</i> 34H<br/> <i>Corynebacterium glutamicum</i> ATCC 13032<br/> <i>Coxiella burnetii</i> RSA 493<br/> <i>Dechloromonas aromatica</i> RCB<br/> <i>Dehalococcoides ethenogenes</i> 195<br/> <i>Deinococcus radiodurans</i> R1<br/> <i>Desulfotalea psychrophila</i> LSv54<br/> <i>Desulfovibrio vulgaris</i> subsp. <i>vulgaris</i> str. Hildenborough<br/> <i>Ehrlichia ruminantium</i> str. Welgevonden<br/> <i>Enterococcus faecalis</i> V583<br/> <i>Erwinia carotovora</i> subsp. <i>atroseptica</i> SCRI1043<br/> <i>Escherichia coli</i> CFT073<br/> <i>Francisella tularensis</i> subsp. <i>tularensis</i> SCHU S4<br/> <i>Fusobacterium nucleatum</i> subsp. <i>nucleatum</i> ATCC 25586<br/> <i>Geobacillus kaustophilus</i> HTA426<br/> <i>Geobacter metallireducens</i> GS-15<br/> <i>Gloeobacter violaceus</i> PCC 7421<br/> <i>Gluconobacter oxydans</i> 621H<br/> <i>Haemophilus influenzae</i> 86-028NP<br/> <i>Haloarcula marismortui</i> ATCC 43049<br/> <i>Halobacterium</i> sp. NRC-1 </p> | <p> <i>Salmonella typhimurium</i> LT2<br/> <i>Shewanella oneidensis</i> MR-1<br/> <i>Shigella flexneri</i> 2a str. 301<br/> <i>Silicibacter pomeroyi</i> DSS-3<br/> <i>Sinorhizobium meliloti</i> 1021<br/> <i>Staphylococcus aureus</i> subsp. <i>aureus</i> MSSA476<br/> <i>Streptococcus pneumoniae</i> TIGR4<br/> <i>Streptomyces coelicolor</i> A3(2)<br/> <i>Sulfolobus tokodaii</i> str. 7<br/> <i>Symbiobacterium thermophilum</i> IAM 14863<br/> <i>Synechococcus elongatus</i> PCC 6301<br/> <i>Synechocystis</i> sp. PCC 6803<br/> <i>Thermoanaerobacter tengcongensis</i> MB4<br/> <i>Thermobifida fusca</i> YX<br/> <i>Thermococcus kodakarensis</i> KOD1<br/> <i>Thermoplasma volcanium</i> GSS1<br/> <i>Thermosynechococcus elongatus</i> BP-1<br/> <i>Thermotoga maritima</i> MSB8<br/> <i>Thermus thermophilus</i> HB8<br/> <i>Thiobacillus denitrificans</i> ATCC 25259<br/> <i>Thiomicrospira denitrificans</i> ATCC 33889<br/> <i>Treponema denticola</i> ATCC 35405<br/> <i>Tropheryma whipplei</i> TW08/27<br/> <i>Ureaplasma parvum</i> serovar 3 str. ATCC 700970<br/> <i>Vibrio vulnificus</i> YJ016<br/> <i>Wigglesworthia glossinidia</i> endosymbiont of <i>Glossina brevipalpis</i><br/> <i>Wolbachia</i> endosymbiont of <i>Drosophila melanogaster</i><br/> <i>Xanthomonas campestris</i> pv. <i>vesicatoria</i> str. 85-10<br/> <i>Xylella fastidiosa</i> 9a5c<br/> <i>Yersinia pestis</i> biovar <i>Medievalis</i> str. 91001<br/> <i>Zymomonas mobilis</i> subsp. <i>mobilis</i> ZM4 </p> |
|-----------------------------------------------------------------------------------------------------------------------------------------------------------------------------------------------------------------------------------------------------------------------------------------------------------------------------------------------------------------------------------------------------------------------------------------------------------------------------------------------------------------------------------------------------------------------------------------------------------------------------------------------------------------------------------------------------------------------------------------------------------------------------------------------------------------------------------------------------------------------------------------------------------------------------------------------------------------------------------------------------------------------------------------------------------------------------------------------------------------------------------------------------------------------------------------------------------------------------------------------------------------------------------------------------------------------------------------------------------------------------------------------------------------------------------------------------------------------------------------------------|-----------------------------------------------------------------------------------------------------------------------------------------------------------------------------------------------------------------------------------------------------------------------------------------------------------------------------------------------------------------------------------------------------------------------------------------------------------------------------------------------------------------------------------------------------------------------------------------------------------------------------------------------------------------------------------------------------------------------------------------------------------------------------------------------------------------------------------------------------------------------------------------------------------------------------------------------------------------------------------------------------------------------------------------------------------------------------------------------------------------------------------------------------------------------------------------------------------------------------------------------------------------------------------------------------------------------------------------------------------------------------------------------------------------------------------------------------------------------------------------------------------------------------|
